# Supplementary material for: Validation of the long international physical activity questionnaire: Influence of age and language region
Source: PubMed Central journal article supplement — Prev Med Rep. 2016 Mar 9;3:250–6. doi: 10.1016/j.pmedr.2016.03.003 (PMC4929234; doi:10.1016/j.pmedr.2016.03.003), 2016-03-09
Supplement: mmc1.pdf [file mmc1.pdf]

**Supplementary Material Table 1.** Spearman correlations (r) for time spent in different physical activity intensities and domains as recorded by IPAQ long and Actigraph accelerometers with 95% CI based on Fisher's z transformation (Switzerland, 2011, N=346)

| IPAQ long                                           | Actigraph                 | Gender               |                      |                      | Age group            |                      |                      | Language region      |                      |                      |
|-----------------------------------------------------|---------------------------|----------------------|----------------------|----------------------|----------------------|----------------------|----------------------|----------------------|----------------------|----------------------|
|                                                     |                           | All                  | Men                  | Women                | 18-39y               | 40-64y               | ≥65y                 | German               | French               | Italian              |
| Total (MET-min/week)                                | Total (counts/min)        | 0.27 (0.15 - 0.38)   | 0.27 (0.10 - 0.42)   | 0.28 (0.12 - 0.42)   | 0.27 (0.00 - 0.50)   | 0.34 (0.18 - 0.47)   | 0.32 (0.09 - 0.52)   | 0.33 (0.15 - 0.49)   | 0.30 (0.09 - 0.48)   | 0.19 (-0.04 - 0.40)  |
| Total (min mvpa/week)                               | Total (min mvpa/week)     | 0.09 (-0.03 - 0.21)  | 0.16 (-0.01 - 0.33)  | 0.04 (-0.13 - 0.20)  | 0.09 (-0.18 - 0.35)  | 0.21 (0.05 - 0.36)   | -0.01 (-0.25 - 0.23) | 0.12 (-0.07 - 0.31)  | 0.14 (-0.08 - 0.34)  | 0.04 (-0.19 - 0.27)  |
| Vigorous (min/week)                                 | Vigorous (min/week)       | 0.41 (0.31 - 0.49)   | 0.31 (0.16 - 0.45)   | 0.48 (0.35 - 0.58)   | 0.40 (0.16 - 0.60)   | 0.40 (0.27 - 0.52)   | 0.28 (0.08 - 0.46)   | 0.28 (0.12 - 0.43)   | 0.36 (0.18 - 0.52)   | 0.53 (0.36 - 0.66)   |
| Moderate (min/week)                                 | Moderate (min/week)       | -0.12 (-0.23 - 0.00) | -0.06 (-0.23 - 0.11) | -0.13 (-0.29 - 0.03) | -0.15 (-0.40 - 0.13) | -0.03 (-0.19 - 0.13) | -0.11 (-0.33 - 0.13) | -0.16 (-0.34 - 0.03) | -0.08 (-0.29 - 0.13) | -0.09 (-0.30 - 0.13) |
| Moderate (min/week)                                 | Light (min/week)          | 0.37 (0.26 - 0.46)   | 0.34 (0.18 - 0.49)   | 0.38 (0.23 - 0.51)   | 0.32 (0.06 - 0.54)   | 0.37 (0.22 - 0.50)   | 0.42 (0.21 - 0.59)   | 0.43 (0.27 - 0.57)   | 0.26 (0.05 - 0.45)   | 0.40 (0.20 - 0.57)   |
| Moderate + walking (min/week)                       | Moderate (min/week)       | 0.03 (-0.09 - 0.15)  | 0.10 (-0.08 - 0.27)  | -0.01 (-0.17 - 0.16) | 0.00 (-0.26 - 0.27)  | 0.13 (-0.03 - 0.29)  | -0.02 (-0.26 - 0.22) | 0.08 (-0.12 - 0.26)  | 0.07 (-0.15 - 0.28)  | 0.00 (-0.22 - 0.23)  |
| Moderate + walking (min/week)                       | Light (min/week)          | 0.34 (0.23 - 0.44)   | 0.33 (0.16 - 0.48)   | 0.33 (0.18 - 0.47)   | 0.35 (0.09 - 0.57)   | 0.31 (0.16 - 0.46)   | 0.39 (0.17 - 0.58)   | 0.47 (0.30 - 0.60)   | 0.21 (-0.00 - 0.41)  | 0.27 (0.05 - 0.47)   |
| Walking (min/week)                                  | Moderate (min/week)       | 0.27 (0.16 - 0.37)   | 0.29 (0.13 - 0.43)   | 0.25 (0.10 - 0.39)   | 0.24 (-0.02 - 0.47)  | 0.33 (0.19 - 0.46)   | 0.29 (0.08 - 0.48)   | 0.35 (0.18 - 0.49)   | 0.32 (0.13 - 0.49)   | 0.21 (0.00 - 0.40)   |
| Sitting time (hours/week) incl. motorized transport | Sitting time (hours/week) | 0.42 (0.32 - 0.50)   | 0.28 (0.12 - 0.42)   | 0.53 (0.42 - 0.63)   | 0.72 (0.57 - 0.83)   | 0.36 (0.23 - 0.49)   | 0.34 (0.14 - 0.52)   | 0.39 (0.23 - 0.53)   | 0.46 (0.29 - 0.60)   | 0.32 (0.12 - 0.49)   |
| Physical activity at work (MET-min/week)            | mvpa (min/week)           | 0.03 (-0.08 - 0.14)  | 0.10 (-0.06 - 0.26)  | -0.05 (-0.20 - 0.10) | -0.03 (-0.29 - 0.24) | 0.02 (-0.13 - 0.17)  | -0.07 (-0.27 - 0.13) | 0.07 (-0.10 - 0.24)  | 0.04 (-0.16 - 0.24)  | 0.00 (-0.21 - 0.20)  |
| Physical activity for transport (MET-min/week)      | mvpa (min/week)           | 0.25 (0.15 - 0.35)   | 0.22 (0.07 - 0.37)   | 0.28 (0.13 - 0.41)   | 0.32 (0.07 - 0.54)   | 0.28 (0.14 - 0.42)   | 0.27 (0.06 - 0.44)   | 0.19 (0.02 - 0.36)   | 0.28 (0.09 - 0.45)   | 0.27 (0.07 - 0.45)   |
| Domestic physical activity (MET-min/week)           | mvpa (min/week)           | -0.20 (-0.30 - 0.30) | -0.16 (-0.32 - 0.32) | -0.20 (-0.34 - 0.34) | 0.04 (-0.22 - 0.30)  | -0.13 (-0.28 - 0.32) | -0.12 (-0.32 - 0.32) | -0.25 (-0.41 - 0.35) | -0.16 (-0.35 - 0.35) | -0.13 (-0.33 - 0.33) |

|                                               |                 | 0.09)              | 0.00)              | 0.04)              |                      | 0.03)              | 0.09)              | 0.08)              | 0.05)              | 0.08)               |
|-----------------------------------------------|-----------------|--------------------|--------------------|--------------------|----------------------|--------------------|--------------------|--------------------|--------------------|---------------------|
| Leisure-time physical activity (MET-min/week) | mvpa (min/week) | 0.48 (0.39 - 0.56) | 0.35 (0.20 - 0.49) | 0.57 (0.47 - 0.67) | - 0.34 (0.09 - 0.55) | 0.56 (0.44 - 0.65) | 0.37 (0.17 - 0.54) | 0.44 (0.28 - 0.57) | 0.51 (0.35 - 0.64) | 0.45 (0.27 to 0.60) |

mvpa=moderate-to-vigorous physical activity
