# Supplementary material for: Validation of the long international physical activity questionnaire: Influence of age and language region
Source: PubMed Central journal article supplement — Prev Med Rep. 2016 Mar 9;3:250–6. doi: 10.1016/j.pmedr.2016.03.003 (PMC4929234; doi:10.1016/j.pmedr.2016.03.003), 2016-03-09
Supplement: mmc2.pdf [file mmc2.pdf]

**Supplementary Material Table 2.** Drop out analysis (N=230 SAPALDIA participants in validation study sample)

|                                              | SAPALDIA 1 (1991)<br>N=9651 |                  |          | SAPALDIA 3 (2010/11)<br>N=6088 |                  |          |
|----------------------------------------------|-----------------------------|------------------|----------|--------------------------------|------------------|----------|
|                                              | in sample<br>n=230          | not in<br>sample | P value* | in sample<br>n=230             | not in<br>sample | P value* |
| Age, years (SD)                              | 37.6 (10.9)                 | 41.1 (11.7)      | <0.001   | 57.3 (10.8)                    | 59.8 (11.3)      | 0.001    |
| BMI, kg/m <sup>2</sup> (SD)                  | 23.3 (3.5)                  | 24.0 (3.9)       | 0.004    | 26.6 (4.6)                     | 26.4 (4.6)       | 0.5      |
| Sex (%)                                      |                             |                  | 0.4      |                                |                  | 0.7      |
| men                                          | 46.1                        | 49.2             |          | 46.1                           | 47.6             |          |
| women                                        | 53.9                        | 50.8             |          | 53.9                           | 52.4             |          |
| Smoking status (%)                           |                             |                  | 0.5      |                                |                  | 0.5      |
| current non-smoker                           | 64.3                        | 66.5             |          | 80.0                           | 81.7             |          |
| current smoker                               | 35.7                        | 33.5             |          | 20.0                           | 18.3             |          |
| Doctor diagnosed current asthma (%)          | 1.7                         | 2.9              | 0.4      | 3.5                            | 4.1              | 0.7      |
| Doctor diagnosed cardiovascular diseases (%) | na                          | na               |          | 25.7                           | 35.8             | 0.001    |

\*P values are for the comparison between SAPALDIA participants in the IPAQ validation study and SAPALDIA nonparticipants. P values were calculated with the use of T-test or Fisher's exact test.
