# Supplementary material for: Validation of the long international physical activity questionnaire: Influence of age and language region
Source: PubMed Central journal article supplement — Prev Med Rep. 2016 Mar 9;3:250–6. doi: 10.1016/j.pmedr.2016.03.003 (PMC4929234; doi:10.1016/j.pmedr.2016.03.003), 2016-03-09
Supplement: mmc3.pdf [file mmc3.pdf]

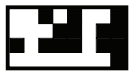

7099

251

barcode

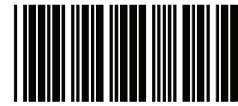

Welches Datum ist heute?  
(TTMMJJJJ)

|  |  |  |  |  |  |  |  |
|--|--|--|--|--|--|--|--|
|  |  |  |  |  |  |  |  |
|--|--|--|--|--|--|--|--|

## INTERNATIONALER FRAGEBOGEN ZUR KÖRPERLICHEN AKTIVITÄT (International physical activity questionnaire - IPAQ)

Wir sind daran interessiert herauszufinden welche Arten von körperlichen Aktivitäten Menschen in ihrem alltäglichen Leben vollziehen. Die Befragung bezieht sich auf die Zeit, die Sie während der letzten 7 Tage in körperlicher Aktivität verbracht haben. Bitte beantworten Sie alle Fragen (auch wenn Sie sich selbst nicht als aktive Person ansehen). Bitte berücksichtigen Sie die Aktivitäten im Rahmen Ihrer Arbeit, in Haus und Garten, um von einem Ort zum anderen zu kommen und in Ihrer Freizeit für Erholung, Bewegung, Training und Sport.

Denken Sie an all Ihre **anstrengenden** und **mässig intensiven** Aktivitäten in den **vergangenen 7 Tagen**. **Anstrengende** Aktivitäten bezeichnen Aktivitäten die starke körperliche Anstrengungen erfordern und bei denen Sie deutlich stärker atmen als normal. **Mässig intensive** Aktivitäten bezeichnen Aktivitäten mit mässiger körperlicher Anstrengung bei denen Sie ein wenig stärker atmen als normal.

### TEIL 1: KÖRPERLICHE AKTIVITÄT AM ARBEITSPLATZ

Im ersten Abschnitt geht es um Ihre Arbeit. Das beinhaltet bezahlte Arbeit, Landwirtschaft, freiwillige Tätigkeiten, Seminare und alle anderen unbezahlten Tätigkeiten, die Sie ausserhalb von zuhause verrichtet haben. Geben Sie hier keine unbezahlten Tätigkeiten an, die Sie zuhause verrichtet haben, wie Arbeiten in Haus und Garten, anfallende Instandhaltungsarbeiten und sorgen für die Familie. Dies wird in Abschnitt 3 befragt.

|                                                                                                               |                                                                                                                       |
|---------------------------------------------------------------------------------------------------------------|-----------------------------------------------------------------------------------------------------------------------|
| 1. Haben Sie momentan einen Job oder verrichten Sie irgendwelche unbezahlten Arbeiten ausserhalb von zuhause? | <input type="checkbox"/> Ja<br><input type="checkbox"/> Nein    --> <b>Springen Sie weiter zu Teil 2: BEFÖRDERUNG</b> |
|---------------------------------------------------------------------------------------------------------------|-----------------------------------------------------------------------------------------------------------------------|

Die folgenden Fragen sind über die körperliche Aktivität in den **vergangenen 7 Tagen** im Rahmen Ihrer bezahlten und unbezahlten Arbeit. Dies beinhaltet keine Wegstrecken zu oder von der Arbeit.

|                                                                                                                                                                                                                                                                                                                                          |                                                                                                                                                                                     |
|------------------------------------------------------------------------------------------------------------------------------------------------------------------------------------------------------------------------------------------------------------------------------------------------------------------------------------------|-------------------------------------------------------------------------------------------------------------------------------------------------------------------------------------|
| 2. An wie vielen der <b>vergangenen 7 Tage</b> haben Sie <b>anstrengende</b> körperliche Aktivitäten wie schweres Heben, Graben, schwere Bauarbeit oder Treppen steigen <b>im Rahmen Ihrer Arbeit</b> verrichtet? Denken Sie dabei nur an körperliche Aktivitäten die Sie für mindestens 10 Minuten ohne Unterbrechung verrichtet haben. | <input type="checkbox"/> Tage pro Woche<br><br><input type="checkbox"/> Keine anstrengenden körperlichen Aktivitäten im Rahmen der Arbeit --> <b>Springen Sie weiter zu Frage 3</b> |
|------------------------------------------------------------------------------------------------------------------------------------------------------------------------------------------------------------------------------------------------------------------------------------------------------------------------------------------|-------------------------------------------------------------------------------------------------------------------------------------------------------------------------------------|

|                                                                                                                                                   |                                                                                                                                                                   |  |                 |  |                 |  |  |  |                 |
|---------------------------------------------------------------------------------------------------------------------------------------------------|-------------------------------------------------------------------------------------------------------------------------------------------------------------------|--|-----------------|--|-----------------|--|--|--|-----------------|
| 2.1 Wie viel Zeit haben Sie für gewöhnlich an einem dieser Tage mit <b>anstrengender</b> körperlicher Aktivität im Rahmen ihrer Arbeit verbracht? | <table border="1"> <tr> <td> </td><td> </td><td> </td> <td>Stunden pro Tag</td> </tr> <tr> <td> </td><td> </td><td> </td> <td>Minuten pro Tag</td> </tr> </table> |  |                 |  | Stunden pro Tag |  |  |  | Minuten pro Tag |
|                                                                                                                                                   |                                                                                                                                                                   |  | Stunden pro Tag |  |                 |  |  |  |                 |
|                                                                                                                                                   |                                                                                                                                                                   |  | Minuten pro Tag |  |                 |  |  |  |                 |

|                                                                                                                                                                                                                                                                                                                                                      |                                                                                                                                                                              |
|------------------------------------------------------------------------------------------------------------------------------------------------------------------------------------------------------------------------------------------------------------------------------------------------------------------------------------------------------|------------------------------------------------------------------------------------------------------------------------------------------------------------------------------|
| 3. Denken Sie erneut nur an die körperlichen Aktivitäten die Sie für mindestens 10 Minuten ohne Unterbrechung verrichtet haben. An wie vielen der <b>vergangenen 7 Tage</b> haben Sie <b>mässig intensive</b> körperliche Aktivitäten wie Tragen leichter Lasten <b>im Rahmen Ihrer Arbeit</b> verrichtet? Wege zu Fuss bitte nicht mit einbeziehen. | <input type="checkbox"/> Tage pro Woche<br><br><input type="checkbox"/> Keine mässig körperlichen Aktivitäten im Rahmen der Arbeit --> <b>Springen Sie weiter zu Frage 4</b> |
|------------------------------------------------------------------------------------------------------------------------------------------------------------------------------------------------------------------------------------------------------------------------------------------------------------------------------------------------------|------------------------------------------------------------------------------------------------------------------------------------------------------------------------------|

|                                                                                                                                                                                                                                                     |                                                                                                                                                                                                                                                                                                                                                                     |                      |                      |                      |                 |                      |                      |                      |                 |
|-----------------------------------------------------------------------------------------------------------------------------------------------------------------------------------------------------------------------------------------------------|---------------------------------------------------------------------------------------------------------------------------------------------------------------------------------------------------------------------------------------------------------------------------------------------------------------------------------------------------------------------|----------------------|----------------------|----------------------|-----------------|----------------------|----------------------|----------------------|-----------------|
| <p>3.1 Wie viel Zeit haben Sie für gewöhnlich an einem dieser Tage mit <b>mässig intensiver</b> körperlicher Aktivität im Rahmen Ihrer Arbeit verbracht?</p>                                                                                        | <table style="width: 100%;"> <tr> <td style="width: 100px;"><input type="text"/></td> <td style="width: 100px;"><input type="text"/></td> <td style="width: 100px;"><input type="text"/></td> <td>Stunden pro Tag</td> </tr> <tr> <td><input type="text"/></td> <td><input type="text"/></td> <td><input type="text"/></td> <td>Minuten pro Tag</td> </tr> </table> | <input type="text"/> | <input type="text"/> | <input type="text"/> | Stunden pro Tag | <input type="text"/> | <input type="text"/> | <input type="text"/> | Minuten pro Tag |
| <input type="text"/>                                                                                                                                                                                                                                | <input type="text"/>                                                                                                                                                                                                                                                                                                                                                | <input type="text"/> | Stunden pro Tag      |                      |                 |                      |                      |                      |                 |
| <input type="text"/>                                                                                                                                                                                                                                | <input type="text"/>                                                                                                                                                                                                                                                                                                                                                | <input type="text"/> | Minuten pro Tag      |                      |                 |                      |                      |                      |                 |
| <p>4. An wie vielen der <b>vergangenen 7 Tage</b> haben Sie <b>Wege</b> von mindestens 10 Minuten <b>zu Fuss</b> ohne Unterbrechung <b>im Rahmen Ihrer Arbeit</b> zurückgelegt? Bitte keine Wegstrecken zu oder von der Arbeit mit einbeziehen.</p> | <p><input type="text"/> Tage pro Woche</p> <p><input type="checkbox"/> Keine Wege zu Fuss im Rahmen der Arbeit --&gt; <b>Springen Sie weiter zu Teil 2: BEFÖRDERUNG</b></p>                                                                                                                                                                                         |                      |                      |                      |                 |                      |                      |                      |                 |
| <p>4.1 Wie viel Zeit haben Sie an einem dieser Tage für gewöhnlich mit <b>Wegen zu Fuss</b> im Rahmen Ihrer Arbeit verbracht?</p>                                                                                                                   | <table style="width: 100%;"> <tr> <td style="width: 100px;"><input type="text"/></td> <td style="width: 100px;"><input type="text"/></td> <td style="width: 100px;"><input type="text"/></td> <td>Stunden pro Tag</td> </tr> <tr> <td><input type="text"/></td> <td><input type="text"/></td> <td><input type="text"/></td> <td>Minuten pro Tag</td> </tr> </table> | <input type="text"/> | <input type="text"/> | <input type="text"/> | Stunden pro Tag | <input type="text"/> | <input type="text"/> | <input type="text"/> | Minuten pro Tag |
| <input type="text"/>                                                                                                                                                                                                                                | <input type="text"/>                                                                                                                                                                                                                                                                                                                                                | <input type="text"/> | Stunden pro Tag      |                      |                 |                      |                      |                      |                 |
| <input type="text"/>                                                                                                                                                                                                                                | <input type="text"/>                                                                                                                                                                                                                                                                                                                                                | <input type="text"/> | Minuten pro Tag      |                      |                 |                      |                      |                      |                 |

## Teil 2: KÖRPERLICHE AKTIVITÄT ZUR BEFÖRDERUNG

In diesen Fragen geht es um die Fortbewegungen von einem Ort zum anderen, wie die Wege zu Arbeit, Geschäften, Kino, usw.

|                                                                                                                                                                            |                                                                                                                                                                                                                                                                                                                                                                     |                      |                      |                      |                 |                      |                      |                      |                 |
|----------------------------------------------------------------------------------------------------------------------------------------------------------------------------|---------------------------------------------------------------------------------------------------------------------------------------------------------------------------------------------------------------------------------------------------------------------------------------------------------------------------------------------------------------------|----------------------|----------------------|----------------------|-----------------|----------------------|----------------------|----------------------|-----------------|
| <p>5. An wie vielen der <b>vergangenen 7 Tage</b> sind Sie mit einem <b>motorisierten Verkehrsmittel</b> wie Zug, Bus, Auto oder Tram <b>gefahren</b>?</p>                 | <p><input type="text"/> Tage pro Woche</p> <p><input type="checkbox"/> Keine Fahrten in motorisierten Verkehrsmitteln<br/>--&gt; <b>Springen Sie weiter zu Frage 6</b></p>                                                                                                                                                                                          |                      |                      |                      |                 |                      |                      |                      |                 |
| <p>5.1 Wie viel Zeit haben Sie für gewöhnlich an einem dieser Tage mit <b>Fahrten</b> in Zug, Bus, Auto, Tram oder irgendeinem motorisierten Verkehrsmittel verbracht?</p> | <table style="width: 100%;"> <tr> <td style="width: 100px;"><input type="text"/></td> <td style="width: 100px;"><input type="text"/></td> <td style="width: 100px;"><input type="text"/></td> <td>Stunden pro Tag</td> </tr> <tr> <td><input type="text"/></td> <td><input type="text"/></td> <td><input type="text"/></td> <td>Minuten pro Tag</td> </tr> </table> | <input type="text"/> | <input type="text"/> | <input type="text"/> | Stunden pro Tag | <input type="text"/> | <input type="text"/> | <input type="text"/> | Minuten pro Tag |
| <input type="text"/>                                                                                                                                                       | <input type="text"/>                                                                                                                                                                                                                                                                                                                                                | <input type="text"/> | Stunden pro Tag      |                      |                 |                      |                      |                      |                 |
| <input type="text"/>                                                                                                                                                       | <input type="text"/>                                                                                                                                                                                                                                                                                                                                                | <input type="text"/> | Minuten pro Tag      |                      |                 |                      |                      |                      |                 |

Denken Sie jetzt nur an das **Velofahren** und **zu Fuss Gehen**, beim Weg zu und von der Arbeit, bei Einkäufen oder Besorgungen, sowie um von einem Ort zum anderen zu gelangen.

|                                                                                                                                                                                      |                                                                                                                                                                                                                                                                                                                                                                     |                      |                      |                      |                 |                      |                      |                      |                 |
|--------------------------------------------------------------------------------------------------------------------------------------------------------------------------------------|---------------------------------------------------------------------------------------------------------------------------------------------------------------------------------------------------------------------------------------------------------------------------------------------------------------------------------------------------------------------|----------------------|----------------------|----------------------|-----------------|----------------------|----------------------|----------------------|-----------------|
| <p>6. An wie vielen der <b>vergangenen 7 Tage</b> sind Sie für mindestens 10 Minuten ohne Unterbrechung <b>Velo gefahren</b> um <b>von einem Ort zum anderen</b> zu gelangen?</p>    | <p><input type="text"/> Tage pro Woche</p> <p><input type="checkbox"/> Kein Velofahren von einem Ort zum anderen. --&gt; <b>Springen Sie weiter zu Frage 7</b></p>                                                                                                                                                                                                  |                      |                      |                      |                 |                      |                      |                      |                 |
| <p>6.1 Wie viel Zeit haben Sie für gewöhnlich an einem dieser Tage für das <b>Velofahren</b> von einem Ort zum anderen verwendet?</p>                                                | <table style="width: 100%;"> <tr> <td style="width: 100px;"><input type="text"/></td> <td style="width: 100px;"><input type="text"/></td> <td style="width: 100px;"><input type="text"/></td> <td>Stunden pro Tag</td> </tr> <tr> <td><input type="text"/></td> <td><input type="text"/></td> <td><input type="text"/></td> <td>Minuten pro Tag</td> </tr> </table> | <input type="text"/> | <input type="text"/> | <input type="text"/> | Stunden pro Tag | <input type="text"/> | <input type="text"/> | <input type="text"/> | Minuten pro Tag |
| <input type="text"/>                                                                                                                                                                 | <input type="text"/>                                                                                                                                                                                                                                                                                                                                                | <input type="text"/> | Stunden pro Tag      |                      |                 |                      |                      |                      |                 |
| <input type="text"/>                                                                                                                                                                 | <input type="text"/>                                                                                                                                                                                                                                                                                                                                                | <input type="text"/> | Minuten pro Tag      |                      |                 |                      |                      |                      |                 |
| <p>7. An wie vielen der <b>vergangenen 7 Tage</b> sind Sie für mindestens 10 Minuten ohne Unterbrechung <b>zu Fuss gegangen</b> um <b>von einem Ort zum anderen</b> zu gelangen?</p> | <p><input type="text"/> Tage pro Woche</p> <p><input type="checkbox"/> Kein zu Fuss Gehen von einem Ort zum anderen. --&gt; <b>Springen Sie weiter zu Teil 3: HAUSARBEIT, HAUSINSTANDHALTUNG UND SORGEN FÜR DIE FAMILIE</b></p>                                                                                                                                     |                      |                      |                      |                 |                      |                      |                      |                 |

|                                                                                                                                          |                                                                                                                                                                                                                                                                                                                                                                     |                      |                      |                      |                 |                      |                      |                      |                 |
|------------------------------------------------------------------------------------------------------------------------------------------|---------------------------------------------------------------------------------------------------------------------------------------------------------------------------------------------------------------------------------------------------------------------------------------------------------------------------------------------------------------------|----------------------|----------------------|----------------------|-----------------|----------------------|----------------------|----------------------|-----------------|
| <p>7.1 Wie viel Zeit haben Sie für gewöhnlich an einem dieser Tage für das <b>zu Fuss gehen</b> von einem Ort zum anderen verwendet?</p> | <table style="width: 100%;"> <tr> <td style="width: 100px;"><input type="text"/></td> <td style="width: 100px;"><input type="text"/></td> <td style="width: 100px;"><input type="text"/></td> <td>Stunden pro Tag</td> </tr> <tr> <td><input type="text"/></td> <td><input type="text"/></td> <td><input type="text"/></td> <td>Minuten pro Tag</td> </tr> </table> | <input type="text"/> | <input type="text"/> | <input type="text"/> | Stunden pro Tag | <input type="text"/> | <input type="text"/> | <input type="text"/> | Minuten pro Tag |
| <input type="text"/>                                                                                                                     | <input type="text"/>                                                                                                                                                                                                                                                                                                                                                | <input type="text"/> | Stunden pro Tag      |                      |                 |                      |                      |                      |                 |
| <input type="text"/>                                                                                                                     | <input type="text"/>                                                                                                                                                                                                                                                                                                                                                | <input type="text"/> | Minuten pro Tag      |                      |                 |                      |                      |                      |                 |

### TEIL 3: HAUSARBEIT, HAUSINSTANDHALTUNG UND SORGEN FÜR DIE FAMILIE

In diesem Abschnitt geht es um körperliche Aktivitäten, die Sie in den **vergangen 7 Tagen** in und um ihr Haus verrichtet haben, wie Hausarbeit, Arbeiten in Hof und Garten, Instandhaltungsarbeiten und sorgen für die Familie.

|                                                                                                                                                                                                                                                                                                                                                |                                                                                                                                                                                                                                                                                                                                                                     |                      |                      |                      |                 |                      |                      |                      |                 |
|------------------------------------------------------------------------------------------------------------------------------------------------------------------------------------------------------------------------------------------------------------------------------------------------------------------------------------------------|---------------------------------------------------------------------------------------------------------------------------------------------------------------------------------------------------------------------------------------------------------------------------------------------------------------------------------------------------------------------|----------------------|----------------------|----------------------|-----------------|----------------------|----------------------|----------------------|-----------------|
| <p>8. Denken Sie nur an die körperlichen Aktivitäten, die Sie für mindestens 10 Minuten ohne Unterbrechung verrichtet haben. An wie vielen der <b>vergangenen 7 Tage</b> haben Sie <b>anstrengende</b> körperliche Aktivitäten wie Tragen schwerer Lasten, Holzhaken, Schneeschaufeln oder Graben <b>im Hof oder im Garten</b> verrichtet?</p> | <p><input type="text"/> Tage pro Woche</p> <p><input type="checkbox"/> Keine anstrengenden körperlichen Aktivitäten im Hof oder im Garten. --&gt; <b>Springen Sie weiter zu Frage 9</b></p>                                                                                                                                                                         |                      |                      |                      |                 |                      |                      |                      |                 |
| <p>8.1 Wie viel Zeit haben Sie für gewöhnlich an einem dieser Tage mit <b>anstrengender Aktivität</b> in Garten und Hof verbracht?</p>                                                                                                                                                                                                         | <table style="width: 100%;"> <tr> <td style="width: 100px;"><input type="text"/></td> <td style="width: 100px;"><input type="text"/></td> <td style="width: 100px;"><input type="text"/></td> <td>Stunden pro Tag</td> </tr> <tr> <td><input type="text"/></td> <td><input type="text"/></td> <td><input type="text"/></td> <td>Minuten pro Tag</td> </tr> </table> | <input type="text"/> | <input type="text"/> | <input type="text"/> | Stunden pro Tag | <input type="text"/> | <input type="text"/> | <input type="text"/> | Minuten pro Tag |
| <input type="text"/>                                                                                                                                                                                                                                                                                                                           | <input type="text"/>                                                                                                                                                                                                                                                                                                                                                | <input type="text"/> | Stunden pro Tag      |                      |                 |                      |                      |                      |                 |
| <input type="text"/>                                                                                                                                                                                                                                                                                                                           | <input type="text"/>                                                                                                                                                                                                                                                                                                                                                | <input type="text"/> | Minuten pro Tag      |                      |                 |                      |                      |                      |                 |
| <p>9. Denken Sie erneut nur an die körperlichen Aktivitäten, die Sie für mindestens 10 Minuten ohne Unterbrechung verrichtet haben. An wie vielen der <b>vergangenen 7 Tage</b> haben Sie <b>mässig intensive</b> Aktivitäten wie Tragen leichter Lasten, Wischen, Fensterputzen und Rechen <b>im Hof oder im Garten</b> verrichtet?</p>       | <p><input type="text"/> Tage pro Woche</p> <p><input type="checkbox"/> Keine mässig intensive Aktivität im Garten oder im Hof. --&gt; <b>Springen Sie weiter zu Frage 10</b></p>                                                                                                                                                                                    |                      |                      |                      |                 |                      |                      |                      |                 |
| <p>9.1 Wie viel Zeit haben Sie für gewöhnlich an einem dieser Tage mit <b>mässig intensiver</b> körperlicher Aktivität im Garten oder im Hof verbracht?</p>                                                                                                                                                                                    | <table style="width: 100%;"> <tr> <td style="width: 100px;"><input type="text"/></td> <td style="width: 100px;"><input type="text"/></td> <td style="width: 100px;"><input type="text"/></td> <td>Stunden pro Tag</td> </tr> <tr> <td><input type="text"/></td> <td><input type="text"/></td> <td><input type="text"/></td> <td>Minuten pro Tag</td> </tr> </table> | <input type="text"/> | <input type="text"/> | <input type="text"/> | Stunden pro Tag | <input type="text"/> | <input type="text"/> | <input type="text"/> | Minuten pro Tag |
| <input type="text"/>                                                                                                                                                                                                                                                                                                                           | <input type="text"/>                                                                                                                                                                                                                                                                                                                                                | <input type="text"/> | Stunden pro Tag      |                      |                 |                      |                      |                      |                 |
| <input type="text"/>                                                                                                                                                                                                                                                                                                                           | <input type="text"/>                                                                                                                                                                                                                                                                                                                                                | <input type="text"/> | Minuten pro Tag      |                      |                 |                      |                      |                      |                 |
| <p>10. Denken Sie erneut nur an die körperlichen Aktivitäten, die Sie für mindestens 10 Minuten ohne Unterbrechung verrichtet haben. An wie vielen der <b>vergangenen 7 Tage</b> haben Sie <b>mässig intensive</b> Aktivitäten wie Tragen leichter Lasten, Fensterputzen, Bodenschrubben und Wischen <b>zu Hause</b> verrichtet?</p>           | <p><input type="text"/> Tage pro Woche</p> <p><input type="checkbox"/> Keine mässig intensiven Aktivitäten zuhause. --&gt; <b>Springen Sie weiter zu Teil 4: KÖRPERLICHE AKTIVITÄTEN IN ERHOLUNG, SPORT UND FREIZEIT</b></p>                                                                                                                                        |                      |                      |                      |                 |                      |                      |                      |                 |
| <p>10.1 Wie viel Zeit haben Sie für gewöhnlich an einem dieser Tage mit <b>mässig intensiven</b> körperlichen Aktivitäten zuhause verbracht?</p>                                                                                                                                                                                               | <table style="width: 100%;"> <tr> <td style="width: 100px;"><input type="text"/></td> <td style="width: 100px;"><input type="text"/></td> <td style="width: 100px;"><input type="text"/></td> <td>Stunden pro Tag</td> </tr> <tr> <td><input type="text"/></td> <td><input type="text"/></td> <td><input type="text"/></td> <td>Minuten pro Tag</td> </tr> </table> | <input type="text"/> | <input type="text"/> | <input type="text"/> | Stunden pro Tag | <input type="text"/> | <input type="text"/> | <input type="text"/> | Minuten pro Tag |
| <input type="text"/>                                                                                                                                                                                                                                                                                                                           | <input type="text"/>                                                                                                                                                                                                                                                                                                                                                | <input type="text"/> | Stunden pro Tag      |                      |                 |                      |                      |                      |                 |
| <input type="text"/>                                                                                                                                                                                                                                                                                                                           | <input type="text"/>                                                                                                                                                                                                                                                                                                                                                | <input type="text"/> | Minuten pro Tag      |                      |                 |                      |                      |                      |                 |

### TEIL 4: KÖRPERLICHE AKTIVITÄTEN IN ERHOLUNG; SPORT UND FREIZEIT

In diesem Abschnitt geht es um alle körperlichen Aktivitäten, die Sie in den **vergangen 7 Tagen** ausschliesslich in Erholung, Sport, Bewegung, Training und Freizeit verrichtet haben. Bitte keine Aktivitäten mit einbeziehen, die Sie bereits angegeben haben.

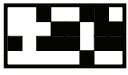

|                                                                                                                                                                                                                                                                                                                                                                                                   |                                                                                                                                                                                                           |
|---------------------------------------------------------------------------------------------------------------------------------------------------------------------------------------------------------------------------------------------------------------------------------------------------------------------------------------------------------------------------------------------------|-----------------------------------------------------------------------------------------------------------------------------------------------------------------------------------------------------------|
| <p>11. Ohne die Fusswege die Sie bereits genannt haben, an wie vielen der <b>vergangenen 7 Tage</b> sind Sie in ihrer <b>Freizeit</b> für mindestens 10 Minuten ohne Unterbrechung <b>zu Fuss</b> gegangen?</p>                                                                                                                                                                                   | <p><input type="checkbox"/> Tage pro Woche</p> <p><input type="checkbox"/> Kein zu Fuss gehen in der Freizeit.--&gt; <b>Springen Sie weiter zu Frage 12</b></p>                                           |
| <p>11.1 Wie viel Zeit haben Sie für gewöhnlich an einem dieser Tage mit <b>zu Fuss gehen</b> in ihrer Freizeit verbracht?</p>                                                                                                                                                                                                                                                                     | <p><input type="text"/> <input type="text"/> <input type="text"/> Stunden pro Tag</p> <p><input type="text"/> <input type="text"/> <input type="text"/> Minuten pro Tag</p>                               |
| <p>12. Denken sie nur an die körperlichen Aktivitäten, die Sie für mindestens 10 Minuten ohne Unterbrechung verrichtet haben. An wie vielen der <b>vergangenen 7 Tage</b> haben Sie <b>anstrengende</b> körperliche Aktivitäten wie Aerobic, Laufen, schnelles Velofahren oder schnelles Schwimmen in ihrer <b>Freizeit</b> verrichtet?</p>                                                       | <p><input type="checkbox"/> Tage pro Woche</p> <p><input type="checkbox"/> Keine anstrengenden Aktivitäten in der Freizeit. --&gt; <b>Springen Sie weiter zu Frage 13</b></p>                             |
| <p>12.1 Wie viel Zeit haben Sie für gewöhnlich an einem dieser Tage mit <b>anstrengender</b> körperlicher Aktivität in ihrer Freizeit verbracht?</p>                                                                                                                                                                                                                                              | <p><input type="text"/> <input type="text"/> <input type="text"/> Stunden pro Tag</p> <p><input type="text"/> <input type="text"/> <input type="text"/> Minuten pro Tag</p>                               |
| <p>13. Denken Sie erneut nur an die körperlichen Aktivitäten, die Sie für mindestens 10 Minuten ohne Unterbrechung verrichtet haben. An wie vielen der <b>vergangenen 7 Tage</b> haben sie <b>mässig intensive</b> körperliche Aktivitäten wie Velofahren bei gewöhnlicher Geschwindigkeit, Schwimmen bei gewöhnlicher Geschwindigkeit und Doppel-Tennis in ihrer <b>Freizeit</b> verrichtet?</p> | <p><input type="checkbox"/> Tage pro Woche</p> <p><input type="checkbox"/> Keine mässig intensiven Aktivitäten in der Freizeit.--&gt; <b>Springen Sie weiter zu Teil 5: IM SITZEN VERBRACHTE ZEIT</b></p> |
| <p>13.1 Wie viel Zeit haben Sie für gewöhnlich an einem dieser Tage mit <b>mässig intensiver</b> körperlicher Aktivität in ihrer Freizeit verbracht?</p>                                                                                                                                                                                                                                          | <p><input type="text"/> <input type="text"/> <input type="text"/> Stunden pro Tag</p> <p><input type="text"/> <input type="text"/> <input type="text"/> Minuten pro Tag</p>                               |

#### TEIL 5: IM SITZEN VERBRACHTE ZEIT

Bei den letzten Fragen geht es um die Zeit die Sie bei der Arbeit, zuhause, bei Seminaren und in der Freizeit im Sitzen verbracht haben. Dies kann Zeit beinhalten wie Sitzen am Schreibtisch, Besuchen von Freunden und vor dem Fernseher sitzen oder liegen. Keine Zeit für Sitzen in einem motorisierten Verkehrsmittel mit einbeziehen von der Sie mir bereits erzählt haben.

|                                                                                                                            |                                                                                                                                                                             |
|----------------------------------------------------------------------------------------------------------------------------|-----------------------------------------------------------------------------------------------------------------------------------------------------------------------------|
| <p>14. Wie viel Zeit haben Sie in den <b>vergangenen 7 Tagen</b> mit <b>Sitzen</b> an <b>Wochentagen</b> verbracht?</p>    | <p><input type="text"/> <input type="text"/> <input type="text"/> Stunden pro Tag</p> <p><input type="text"/> <input type="text"/> <input type="text"/> Minuten pro Tag</p> |
| <p>15. Wie viel Zeit haben Sie an den <b>vergangenen 7 Tagen</b> mit <b>Sitzen</b> an <b>Wochenendtagen</b> verbracht?</p> | <p><input type="text"/> <input type="text"/> <input type="text"/> Stunden pro Tag</p> <p><input type="text"/> <input type="text"/> <input type="text"/> Minuten pro Tag</p> |

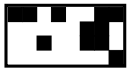

1574

101

barcode

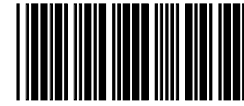

Quelle est la date du jour?  
(JJMMAAAA)

|  |  |  |  |  |  |  |
|--|--|--|--|--|--|--|
|  |  |  |  |  |  |  |
|--|--|--|--|--|--|--|

## QUESTIONNAIRE SUR LES ACTIVITES PHYSIQUES DES 7 DERNIERS JOURS

Nous cherchons à savoir quelles sortes d'activité physique les gens pratiquent dans le cadre de leur vie quotidienne. Cette enquête porte sur le temps que vous avez passé à être actif physiquement ces 7 derniers jours. Merci de répondre à chaque question même si vous ne vous considérez pas comme une personne physiquement active. Pensez aux activités que vous faites au travail, à domicile et dans votre jardin, pour vos déplacements d'un endroit à l'autre et pendant votre temps libre pour les loisirs, l'exercice ou le sport.

Pensez à toutes les **activités intenses** et **modérées** que vous avez faites ces **7 derniers jours**. Les activités **intenses** sont les activités qui demandent un gros effort physique et qui font respirer beaucoup plus fort que d'habitude. Les activités **modérées** sont les activités qui demandent un effort physique modéré et qui font respirer un peu plus fort que d'habitude.

### 1ere PARTIE: ACTIVITE PHYSIQUE LIEE AU TRAVAIL

Par travail on entend les emplois payés, le travail agricole, le travail bénévole, les études, les stages et tout autre type de travail non payé que vous avez effectué en dehors du domicile. Ne tenez pas compte du travail non payé que vous effectuez à domicile, comme faire le ménage, le jardinage, entretenir la maison ou vous occuper de votre famille. Ce travail-là sera abordé dans la 3e partie.

|                                                                                                             |                                                                                                                 |
|-------------------------------------------------------------------------------------------------------------|-----------------------------------------------------------------------------------------------------------------|
| 1. Avez-vous actuellement un emploi ou faites-vous un travail payé ou non payé en dehors de votre domicile? | <input type="checkbox"/> Oui<br><input type="checkbox"/> Non <b>-&gt; Passez à la 2ème partie: DEPLACEMENTS</b> |
|-------------------------------------------------------------------------------------------------------------|-----------------------------------------------------------------------------------------------------------------|

Les questions suivantes portent sur toutes les activités physiques que vous avez faites ces **7 derniers jours** au travail, qu'il soit payé ou non. Cela ne comprend pas les trajets entre votre domicile et votre travail.

|                                                                                                                                                                                                                                                                                                            |                                                                                                                                                             |
|------------------------------------------------------------------------------------------------------------------------------------------------------------------------------------------------------------------------------------------------------------------------------------------------------------|-------------------------------------------------------------------------------------------------------------------------------------------------------------|
| 2. Ces <b>7 derniers jours</b> , pendant combien de jours avez-vous fait des activités physiques <b>intenses au travail</b> comme porter des charges lourdes, creuser, faire de la maçonnerie ou monter des escaliers? Pensez seulement aux activités physiques qui ont duré au moins 10 minutes d'affilé. | <input type="text"/> Jours par semaine<br><br><input type="checkbox"/> Pas d'activités physiques intenses au travail<br><b>-&gt; Passez à la question 3</b> |
|------------------------------------------------------------------------------------------------------------------------------------------------------------------------------------------------------------------------------------------------------------------------------------------------------------|-------------------------------------------------------------------------------------------------------------------------------------------------------------|

|                                                                                                                                                           |                                                                                                                                                                                                                                                                                          |                      |                      |                      |                 |                      |                      |                      |                  |
|-----------------------------------------------------------------------------------------------------------------------------------------------------------|------------------------------------------------------------------------------------------------------------------------------------------------------------------------------------------------------------------------------------------------------------------------------------------|----------------------|----------------------|----------------------|-----------------|----------------------|----------------------|----------------------|------------------|
| 2.1 Quand vous avez fait des activités physiques <b>intenses</b> au travail au cours d'un de ces jours, combien de temps y avez-vous consacré en moyenne? | <table border="1"> <tr> <td><input type="text"/></td> <td><input type="text"/></td> <td><input type="text"/></td> <td>Heures par jour</td> </tr> <tr> <td><input type="text"/></td> <td><input type="text"/></td> <td><input type="text"/></td> <td>Minutes par jour</td> </tr> </table> | <input type="text"/> | <input type="text"/> | <input type="text"/> | Heures par jour | <input type="text"/> | <input type="text"/> | <input type="text"/> | Minutes par jour |
| <input type="text"/>                                                                                                                                      | <input type="text"/>                                                                                                                                                                                                                                                                     | <input type="text"/> | Heures par jour      |                      |                 |                      |                      |                      |                  |
| <input type="text"/>                                                                                                                                      | <input type="text"/>                                                                                                                                                                                                                                                                     | <input type="text"/> | Minutes par jour     |                      |                 |                      |                      |                      |                  |

|                                                                                                                                                                                                                                                                                               |                                                                                                                                                             |
|-----------------------------------------------------------------------------------------------------------------------------------------------------------------------------------------------------------------------------------------------------------------------------------------------|-------------------------------------------------------------------------------------------------------------------------------------------------------------|
| 3. Là encore, pensez seulement aux activités physiques qui ont duré au moins 10 minutes d'affilé. Ces <b>7 derniers jours</b> , pendant combien de jours avez-vous fait des activités physiques <b>modérées</b> comme porter des charges légères <b>au travail</b> ? N'incluez pas la marche. | <input type="text"/> Jours par semaine<br><br><input type="checkbox"/> Pas d'activités physiques modérées au travail<br><b>-&gt; Passez à la question 4</b> |
|-----------------------------------------------------------------------------------------------------------------------------------------------------------------------------------------------------------------------------------------------------------------------------------------------|-------------------------------------------------------------------------------------------------------------------------------------------------------------|

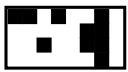

|                                                                                                                                                                                                                        |                                                                                                                                                                                                                                                                                      |                      |                      |                      |                 |                      |                      |                      |                  |
|------------------------------------------------------------------------------------------------------------------------------------------------------------------------------------------------------------------------|--------------------------------------------------------------------------------------------------------------------------------------------------------------------------------------------------------------------------------------------------------------------------------------|----------------------|----------------------|----------------------|-----------------|----------------------|----------------------|----------------------|------------------|
| <p>3.1 Quand vous avez fait des activités physiques <b>modérées</b> au travail au cours d'un de ces jours, combien de temps y avez-vous consacré en moyenne?</p>                                                       | <table border="0"> <tr> <td><input type="text"/></td><td><input type="text"/></td><td><input type="text"/></td> <td>Heures par jour</td> </tr> <tr> <td><input type="text"/></td><td><input type="text"/></td><td><input type="text"/></td> <td>Minutes par jour</td> </tr> </table> | <input type="text"/> | <input type="text"/> | <input type="text"/> | Heures par jour | <input type="text"/> | <input type="text"/> | <input type="text"/> | Minutes par jour |
| <input type="text"/>                                                                                                                                                                                                   | <input type="text"/>                                                                                                                                                                                                                                                                 | <input type="text"/> | Heures par jour      |                      |                 |                      |                      |                      |                  |
| <input type="text"/>                                                                                                                                                                                                   | <input type="text"/>                                                                                                                                                                                                                                                                 | <input type="text"/> | Minutes par jour     |                      |                 |                      |                      |                      |                  |
| <p>4. Ces <b>7 derniers jours</b>, pendant combien de jours avez-vous <b>marché</b> pendant au moins 10 minutes <b>au travail</b>? Ne tenez pas compte de la marche entre votre domicile et votre lieu de travail.</p> | <p><input type="text"/> Jours par semaine</p> <p><input type="checkbox"/> Pas de déplacements à pied au travail.<br/>-&gt; <b>Passez à la 2ème partie: DEPLACEMENTS</b></p>                                                                                                          |                      |                      |                      |                 |                      |                      |                      |                  |
| <p>4.1 Quand vous avez <b>marché</b> au travail au cours d'un de ces jours, combien de temps y avez-vous consacré en moyenne?</p>                                                                                      | <table border="0"> <tr> <td><input type="text"/></td><td><input type="text"/></td><td><input type="text"/></td> <td>Heures par jour</td> </tr> <tr> <td><input type="text"/></td><td><input type="text"/></td><td><input type="text"/></td> <td>Minutes par jour</td> </tr> </table> | <input type="text"/> | <input type="text"/> | <input type="text"/> | Heures par jour | <input type="text"/> | <input type="text"/> | <input type="text"/> | Minutes par jour |
| <input type="text"/>                                                                                                                                                                                                   | <input type="text"/>                                                                                                                                                                                                                                                                 | <input type="text"/> | Heures par jour      |                      |                 |                      |                      |                      |                  |
| <input type="text"/>                                                                                                                                                                                                   | <input type="text"/>                                                                                                                                                                                                                                                                 | <input type="text"/> | Minutes par jour     |                      |                 |                      |                      |                      |                  |

## 2ème PARTIE: ACTIVITE PHYSIQUE LIEE AUX DEPLACEMENTS

Les questions suivantes portent sur la manière dont vous vous êtes déplacé d'un endroit à un autre, notamment pour vous rendre au travail, dans des magasins, au cinéma, etc.

|                                                                                                                                                                                                         |                                                                                                                                                                                                                                                                                      |                      |                      |                      |                 |                      |                      |                      |                  |
|---------------------------------------------------------------------------------------------------------------------------------------------------------------------------------------------------------|--------------------------------------------------------------------------------------------------------------------------------------------------------------------------------------------------------------------------------------------------------------------------------------|----------------------|----------------------|----------------------|-----------------|----------------------|----------------------|----------------------|------------------|
| <p>5. Ces <b>7 derniers jours</b>, pendant combien de jours vous êtes-vous <b>déplacé en véhicule motorisé</b> comme le train, le bus, la voiture ou le tramway?</p>                                    | <p><input type="text"/> Jours par semaine</p> <p><input type="checkbox"/> Pas de déplacements en véhicule motorisé.<br/>-&gt; <b>Passez à la question 6</b></p>                                                                                                                      |                      |                      |                      |                 |                      |                      |                      |                  |
| <p>5.1 Quand vous vous êtes <b>déplacé</b> dans un véhicule à moteur (comme un train, un autobus, une voiture ou un tram) au cours d'un de ces jours, combien de temps cela a-t-il duré en moyenne?</p> | <table border="0"> <tr> <td><input type="text"/></td><td><input type="text"/></td><td><input type="text"/></td> <td>Heures par jour</td> </tr> <tr> <td><input type="text"/></td><td><input type="text"/></td><td><input type="text"/></td> <td>Minutes par jour</td> </tr> </table> | <input type="text"/> | <input type="text"/> | <input type="text"/> | Heures par jour | <input type="text"/> | <input type="text"/> | <input type="text"/> | Minutes par jour |
| <input type="text"/>                                                                                                                                                                                    | <input type="text"/>                                                                                                                                                                                                                                                                 | <input type="text"/> | Heures par jour      |                      |                 |                      |                      |                      |                  |
| <input type="text"/>                                                                                                                                                                                    | <input type="text"/>                                                                                                                                                                                                                                                                 | <input type="text"/> | Minutes par jour     |                      |                 |                      |                      |                      |                  |

Maintenant, pensez seulement à vos déplacements **à vélo** et **à pied** entre votre domicile et votre travail, pour faire des courses ou pour aller d'un endroit à un autre. Ne tenez compte que des trajets à vélo et à pied qui ont duré au moins 10 minutes d'affilée.

|                                                                                                                                                                                       |                                                                                                                                                                                                                                                                                      |                      |                      |                      |                 |                      |                      |                      |                  |
|---------------------------------------------------------------------------------------------------------------------------------------------------------------------------------------|--------------------------------------------------------------------------------------------------------------------------------------------------------------------------------------------------------------------------------------------------------------------------------------|----------------------|----------------------|----------------------|-----------------|----------------------|----------------------|----------------------|------------------|
| <p>6. Ces <b>7 derniers jours</b>, pendant combien de jours avez-vous fait du <b>vélo</b> au moins 10 minutes d'affilée pour aller <b>d'un endroit a un autre</b>?</p>                | <p><input type="text"/> Jours par semaine</p> <p><input type="checkbox"/> Pas de déplacements à vélo d'un endroit à un autre.<br/>-&gt; <b>Passez à la question 7</b></p>                                                                                                            |                      |                      |                      |                 |                      |                      |                      |                  |
| <p>6.1 Quand vous avez fait du <b>vélo</b> au cours d'un de ces jours, combien de temps y avez-vous consacré en moyenne?</p>                                                          | <table border="0"> <tr> <td><input type="text"/></td><td><input type="text"/></td><td><input type="text"/></td> <td>Heures par jour</td> </tr> <tr> <td><input type="text"/></td><td><input type="text"/></td><td><input type="text"/></td> <td>Minutes par jour</td> </tr> </table> | <input type="text"/> | <input type="text"/> | <input type="text"/> | Heures par jour | <input type="text"/> | <input type="text"/> | <input type="text"/> | Minutes par jour |
| <input type="text"/>                                                                                                                                                                  | <input type="text"/>                                                                                                                                                                                                                                                                 | <input type="text"/> | Heures par jour      |                      |                 |                      |                      |                      |                  |
| <input type="text"/>                                                                                                                                                                  | <input type="text"/>                                                                                                                                                                                                                                                                 | <input type="text"/> | Minutes par jour     |                      |                 |                      |                      |                      |                  |
| <p>7. Ces <b>7 derniers jours</b>, pendant combien de jours vous êtes-vous <b>déplacé à pied</b> pendant au moins 10 minutes d'affilée pour aller <b>d'un endroit a un autre</b>?</p> | <p><input type="text"/> Jours par semaine</p> <p><input type="checkbox"/> Pas de déplacements à pied d'un endroit à un autre.<br/>-&gt; <b>Passez à la 3ème partie: MENAGE, ENTRETIEN DE LA MAISON, TEMPS PASSE A S'OCCUPER DE SA FAMILLE</b></p>                                    |                      |                      |                      |                 |                      |                      |                      |                  |

|                                                                                                                                              |                                                                                                                                                                                                                                                                                                                                                                                            |                                                                |                 |                                                                |                  |
|----------------------------------------------------------------------------------------------------------------------------------------------|--------------------------------------------------------------------------------------------------------------------------------------------------------------------------------------------------------------------------------------------------------------------------------------------------------------------------------------------------------------------------------------------|----------------------------------------------------------------|-----------------|----------------------------------------------------------------|------------------|
| <p>7.1 Quand vous avez <b>marché pour vos déplacements</b> au cours d'un de ces jours, combien de temps y avez-vous consacré en moyenne?</p> | <table style="width: 100%;"> <tr> <td style="width: 100px; text-align: center;"><input type="text"/> <input type="text"/> <input type="text"/></td> <td style="text-align: right;">Heures par jour</td> </tr> <tr> <td style="text-align: center;"><input type="text"/> <input type="text"/> <input type="text"/></td> <td style="text-align: right;">Minutes par jour</td> </tr> </table> | <input type="text"/> <input type="text"/> <input type="text"/> | Heures par jour | <input type="text"/> <input type="text"/> <input type="text"/> | Minutes par jour |
| <input type="text"/> <input type="text"/> <input type="text"/>                                                                               | Heures par jour                                                                                                                                                                                                                                                                                                                                                                            |                                                                |                 |                                                                |                  |
| <input type="text"/> <input type="text"/> <input type="text"/>                                                                               | Minutes par jour                                                                                                                                                                                                                                                                                                                                                                           |                                                                |                 |                                                                |                  |

### 3ème PARTIE: MENAGE, ENTRETIEN DE LA MAISON, TEMPS PASSE A S'OCCUPER DE SA FAMILLE

Cette partie porte sur les activités physiques que vous avez faites ces **7 derniers jours** à l'intérieur et à l'extérieur de votre domicile comme faire le ménage, le jardinage, faire des travaux d'entretien et vous occuper de votre famille.

|                                                                                                                                                                                                                                                                                                                                         |                                                                                                                                                                                                                                                                                                                                                                                            |                                                                |                 |                                                                |                  |
|-----------------------------------------------------------------------------------------------------------------------------------------------------------------------------------------------------------------------------------------------------------------------------------------------------------------------------------------|--------------------------------------------------------------------------------------------------------------------------------------------------------------------------------------------------------------------------------------------------------------------------------------------------------------------------------------------------------------------------------------------|----------------------------------------------------------------|-----------------|----------------------------------------------------------------|------------------|
| <p>8. Pensez seulement aux activités physiques qui ont duré au moins 10 minutes d'affilée. Ces <b>7 derniers jours</b>, pendant combien de jours avez-vous fait des activités physiques <b>intenses</b> comme soulever des charges lourdes, couper du bois, déblayer la neige ou bêcher <b>dans votre jardin ou votre cour</b>?</p>     | <p><input type="text"/> Jours par semaine</p> <p><input type="checkbox"/> Pas d'activités physiques intenses dans le jardin ou la cour. -&gt; <b>Passez à la question 9</b></p>                                                                                                                                                                                                            |                                                                |                 |                                                                |                  |
| <p>8.1 Quand vous avez fait des activités physiques <b>intenses</b> dans votre jardin ou votre cour au cours d'un de ces jours, combien de temps y avez-vous consacré en moyenne?</p>                                                                                                                                                   | <table style="width: 100%;"> <tr> <td style="width: 100px; text-align: center;"><input type="text"/> <input type="text"/> <input type="text"/></td> <td style="text-align: right;">Heures par jour</td> </tr> <tr> <td style="text-align: center;"><input type="text"/> <input type="text"/> <input type="text"/></td> <td style="text-align: right;">Minutes par jour</td> </tr> </table> | <input type="text"/> <input type="text"/> <input type="text"/> | Heures par jour | <input type="text"/> <input type="text"/> <input type="text"/> | Minutes par jour |
| <input type="text"/> <input type="text"/> <input type="text"/>                                                                                                                                                                                                                                                                          | Heures par jour                                                                                                                                                                                                                                                                                                                                                                            |                                                                |                 |                                                                |                  |
| <input type="text"/> <input type="text"/> <input type="text"/>                                                                                                                                                                                                                                                                          | Minutes par jour                                                                                                                                                                                                                                                                                                                                                                           |                                                                |                 |                                                                |                  |
| <p>9. Encore une fois, pensez seulement aux activités physiques qui ont duré au moins 10 minutes d'affilée. Ces <b>7 derniers jours</b>, pendant combien de jours avez-vous fait des activités <b>modérées</b> comme soulever des charges légères, balayer, nettoyer les vitres et ratisser <b>dans votre jardin ou votre cour</b>?</p> | <p><input type="text"/> Jours par semaine</p> <p><input type="checkbox"/> Pas d'activités physiques modérées dans le jardin ou la cour. -&gt; <b>Passez à la question 10</b></p>                                                                                                                                                                                                           |                                                                |                 |                                                                |                  |
| <p>9.1 Quand vous avez fait des activités physiques <b>modérées</b> dans votre jardin ou votre cour au cours d'un de ces jours, combien de temps y avez-vous consacré en moyenne?</p>                                                                                                                                                   | <table style="width: 100%;"> <tr> <td style="width: 100px; text-align: center;"><input type="text"/> <input type="text"/> <input type="text"/></td> <td style="text-align: right;">Heures par jour</td> </tr> <tr> <td style="text-align: center;"><input type="text"/> <input type="text"/> <input type="text"/></td> <td style="text-align: right;">Minutes par jour</td> </tr> </table> | <input type="text"/> <input type="text"/> <input type="text"/> | Heures par jour | <input type="text"/> <input type="text"/> <input type="text"/> | Minutes par jour |
| <input type="text"/> <input type="text"/> <input type="text"/>                                                                                                                                                                                                                                                                          | Heures par jour                                                                                                                                                                                                                                                                                                                                                                            |                                                                |                 |                                                                |                  |
| <input type="text"/> <input type="text"/> <input type="text"/>                                                                                                                                                                                                                                                                          | Minutes par jour                                                                                                                                                                                                                                                                                                                                                                           |                                                                |                 |                                                                |                  |
| <p>10. Là encore, pensez seulement aux activités physiques qui ont duré au moins 10 minutes d'affilée. Ces <b>7 derniers jours</b>, pendant combien de jours avez-vous fait des activités <b>modérées</b> comme soulever des charges légères, nettoyer le sol ou les vitres et balayer <b>à l'intérieur de votre domicile</b>?</p>      | <p><input type="text"/> Jours par semaine</p> <p><input type="checkbox"/> Pas d'activités physiques modérées à l'intérieur du domicile. -&gt; <b>Passez à la 4ème partie: ACTIVITES PHYSIQUES LIEES AUX LOISIRS, AU SPORT ET AU TEMPS LIBRE</b></p>                                                                                                                                        |                                                                |                 |                                                                |                  |
| <p>10.1 Quand vous avez fait des activités physiques <b>modérées</b> à l'intérieur de votre maison au cours d'un de ces jours, combien de temps y avez-vous consacré en moyenne?</p>                                                                                                                                                    | <table style="width: 100%;"> <tr> <td style="width: 100px; text-align: center;"><input type="text"/> <input type="text"/> <input type="text"/></td> <td style="text-align: right;">Heures par jour</td> </tr> <tr> <td style="text-align: center;"><input type="text"/> <input type="text"/> <input type="text"/></td> <td style="text-align: right;">Minutes par jour</td> </tr> </table> | <input type="text"/> <input type="text"/> <input type="text"/> | Heures par jour | <input type="text"/> <input type="text"/> <input type="text"/> | Minutes par jour |
| <input type="text"/> <input type="text"/> <input type="text"/>                                                                                                                                                                                                                                                                          | Heures par jour                                                                                                                                                                                                                                                                                                                                                                            |                                                                |                 |                                                                |                  |
| <input type="text"/> <input type="text"/> <input type="text"/>                                                                                                                                                                                                                                                                          | Minutes par jour                                                                                                                                                                                                                                                                                                                                                                           |                                                                |                 |                                                                |                  |

### 4ème PARTIE: ACTIVITE PHYSIQUE LIEE AUX LOISIRS, AU SPORT ET AU TEMPS LIBRE

Cette partie porte sur toutes les activités physiques que vous avez faites ces **7 derniers jours** seulement dans le cadre de votre temps libre, de vos activités sportives ou de vos loisirs. Ne tenez pas compte des activités que vous avez déjà mentionnées.

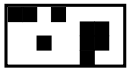

|                                                                                                                                                                                                                                                                                                                                                  |                                                                                                                                                                                                  |
|--------------------------------------------------------------------------------------------------------------------------------------------------------------------------------------------------------------------------------------------------------------------------------------------------------------------------------------------------|--------------------------------------------------------------------------------------------------------------------------------------------------------------------------------------------------|
| <p>11. Sans compter la marche que vous avez déjà mentionnée, ces <b>7 derniers jours</b>, combien de jours avez-vous <b>marché</b> pendant au moins 10 minutes <b>pendant votre temps libre</b>?</p>                                                                                                                                             | <p><input type="text"/> Jours par semaine</p> <p><input type="checkbox"/> Pas de marche pendant le temps libre. <b>-&gt; Passez à la question 12</b></p>                                         |
| <p>11.1 Quand vous avez <b>marché</b> au cours de votre temps libre au cours d'un de ces jours, combien de temps y avez-vous consacré en moyenne?</p>                                                                                                                                                                                            | <p><input type="text"/><input type="text"/><input type="text"/> Heures par jour</p> <p><input type="text"/><input type="text"/><input type="text"/> Minutes par jour</p>                         |
| <p>12. Pensez seulement aux activités physiques qui ont duré au moins 10 minutes d'affilée. Ces <b>7 derniers jours</b>, pendant combien de jours avez-vous fait des activités physiques <b>intenses</b> comme courir, faire du vélo ou nager vite ou faire de la gym type aérobic <b>pendant votre temps libre</b>?</p>                         | <p><input type="text"/> Jours par semaine</p> <p><input type="checkbox"/> Pas d'activités physiques intenses pendant le temps libre. <b>-&gt; Passez à la question 13</b></p>                    |
| <p>12.1 Quand vous avez fait des activités physiques <b>intenses</b> au cours de votre temps libre au cours d'un de ces jours, combien de temps y avez-vous consacré en moyenne?</p>                                                                                                                                                             | <p><input type="text"/><input type="text"/><input type="text"/> Heures par jour</p> <p><input type="text"/><input type="text"/><input type="text"/> Minutes par jour</p>                         |
| <p>13. Encore une fois, pensez seulement aux activités physiques qui ont duré au moins 10 minutes d'affilée. Ces <b>7 derniers jours</b>, pendant combien de jours avez-vous fait des activités physiques <b>modérées</b> comme faire du vélo ou nager à un rythme tranquille ou jouer au tennis en double <b>pendant votre temps libre</b>?</p> | <p><input type="text"/> Jours par semaine</p> <p><input type="checkbox"/> Pas d'activités physiques modérées pendant le temps libre. <b>-&gt; Passez à la 5ème partie: TEMPS PASSE ASSIS</b></p> |
| <p>13.1 Quand vous avez fait des activités physiques <b>modérées</b> pendant votre temps libre au cours d'un de ces jours, combien de temps y avez-vous consacré en moyenne?</p>                                                                                                                                                                 | <p><input type="text"/><input type="text"/><input type="text"/> Heures par jour</p> <p><input type="text"/><input type="text"/><input type="text"/> Minutes par jour</p>                         |

### 5ème PARTIE: TEMPS PASSE ASSIS

Les dernières questions portent sur le temps que vous avez passé **assis** au travail, à la maison, le temps passé à étudier ou en stage et le temps de loisirs. Cela peut comprendre le temps passé assis à votre bureau, assis lors d'une visite chez des amis, le temps passé à lire ou bien le temps passé assis ou allongé à regarder la télé. N'incluez pas le temps passé assis dans un véhicule motorisé que vous avez déjà mentionné.

|                                                                                                                               |                                                                                                                                                                          |
|-------------------------------------------------------------------------------------------------------------------------------|--------------------------------------------------------------------------------------------------------------------------------------------------------------------------|
| <p>14. En moyenne, ces <b>7 derniers jours</b>, combien de temps avez-vous passé <b>assis pendant un jour de semaine</b>?</p> | <p><input type="text"/><input type="text"/><input type="text"/> Heures par jour</p> <p><input type="text"/><input type="text"/><input type="text"/> Minutes par jour</p> |
| <p>15. En moyenne, le week-end dernier, combien de temps avez-vous passé <b>assis au cours d'une journée</b>?</p>             | <p><input type="text"/><input type="text"/><input type="text"/> Heures par jour</p> <p><input type="text"/><input type="text"/><input type="text"/> Minutes par jour</p> |



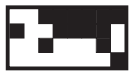

40482

151

barcode

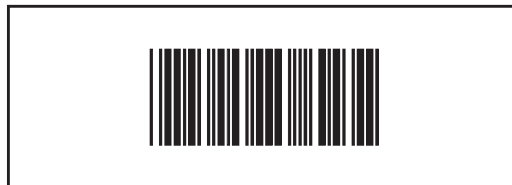Data Odierna  
(GGMMAAAA)

|  |  |  |  |  |  |  |
|--|--|--|--|--|--|--|
|  |  |  |  |  |  |  |
|--|--|--|--|--|--|--|

## QUESTIONARIO INTERNAZIONALE SULL'ATTIVITÀ FISICA

Vogliamo comprendere che tipo di attività fisica le persone fanno normalmente tutti i giorni. Le domande vogliono scoprire per quanto tempo lei ha compiuto dell'attività fisica negli **ultimi 7 giorni**. Il questionario include domande che riguardano l'attività che svolge al lavoro, per spostarsi da un posto all'altro, come durante i lavori domestici e di cura dell'abitazione, ed infine durante il suo tempo libero per svago, esercizio o sport.

Le sue risposte sono importanti. La preghiamo di rispondere a tutte le domande anche se lei non si considera una persona che conduce una vita attiva.

Nel rispondere alle domande la preghiamo di tenere in considerazione i seguenti criteri;

- Per **INTENSA attività fisica** si intende un'attività che richiede uno sforzo fisico elevato e che la costringe a respirare con un ritmo molto più elevato del normale.
- Per **MODERATA attività** si intende un'attività che richiede uno sforzo fisico moderato e che la costringe a respirare con un ritmo solo moderatamente più elevato del normale.

### SEZIONE 1: ATTIVITÀ FISICA COLLEGATA CON IL LAVORO

La prima sezione riguarda il suo lavoro. Devono essere presi in considerazione : il lavoro retribuito, il lavoro di agricoltore, il volontariato, i corsi di formazione e qualsiasi altro tipo di lavoro non retribuito che lei ha svolto al di fuori della sua abitazione. Non deve quindi prendere in considerazione il lavoro non retribuito che potrebbe aver svolto nella sua abitazione, come ad esempio i lavori domestici, il giardinaggio, i lavori di manutenzione generale, o il prendersi cura dei familiari. Queste attività verranno prese in considerazione nella sezione 3.

|                                                                                                                      |                                                                                                          |
|----------------------------------------------------------------------------------------------------------------------|----------------------------------------------------------------------------------------------------------|
| 1. Svolge in questo momento un qualsiasi lavoro retribuito, o anche non retribuito al di fuori della sua abitazione? | <input type="checkbox"/> Sì<br><input type="checkbox"/> No <b>-&gt; Vada alla SEZIONE 2: SPOSTAMENTI</b> |
|----------------------------------------------------------------------------------------------------------------------|----------------------------------------------------------------------------------------------------------|

Le prossime domande riguardano tutte le attività fisiche che lei ha compiuto negli **ultimi 7 giorni** durante il suo lavoro (sia retribuito che non retribuito). Non consideri gli spostamenti per recarsi e tornare dal luogo in cui svolge il lavoro.

|                                                                                                                                                                                                                                                                                                                                                                |                                                                                                                         |
|----------------------------------------------------------------------------------------------------------------------------------------------------------------------------------------------------------------------------------------------------------------------------------------------------------------------------------------------------------------|-------------------------------------------------------------------------------------------------------------------------|
| 2. Per quanti giorni, negli <b>ultimi 7 giorni</b> , lei ha compiuto attività fisiche <b>intense</b> , come ad esempio sollevare dei pesi, scavare dei buchi nel terreno, lavori pesanti di costruzione, salire e scendere le scale, durante <b>il suo lavoro</b> ? Tenga conto solo di quelle attività che l'hanno impegnata per almeno 10 minuti ogni volta. | <input type="text"/> giorni alla settimana<br><br><input type="checkbox"/> Nemmeno uno <b>-&gt; vada alla domanda 3</b> |
|----------------------------------------------------------------------------------------------------------------------------------------------------------------------------------------------------------------------------------------------------------------------------------------------------------------------------------------------------------------|-------------------------------------------------------------------------------------------------------------------------|

|                                                                                                                                                    |                                                                                                                                                                                                                                                                                        |                      |                      |                      |               |                      |                      |                      |                  |
|----------------------------------------------------------------------------------------------------------------------------------------------------|----------------------------------------------------------------------------------------------------------------------------------------------------------------------------------------------------------------------------------------------------------------------------------------|----------------------|----------------------|----------------------|---------------|----------------------|----------------------|----------------------|------------------|
| 2.1 Quanto tempo in totale, normalmente in uno di questi giorni, lei ha trascorso compiendo attività fisiche <b>intense</b> durante il suo lavoro? | <table border="1"> <tr> <td><input type="text"/></td> <td><input type="text"/></td> <td><input type="text"/></td> <td>ore al giorno</td> </tr> <tr> <td><input type="text"/></td> <td><input type="text"/></td> <td><input type="text"/></td> <td>minuti al giorno</td> </tr> </table> | <input type="text"/> | <input type="text"/> | <input type="text"/> | ore al giorno | <input type="text"/> | <input type="text"/> | <input type="text"/> | minuti al giorno |
| <input type="text"/>                                                                                                                               | <input type="text"/>                                                                                                                                                                                                                                                                   | <input type="text"/> | ore al giorno        |                      |               |                      |                      |                      |                  |
| <input type="text"/>                                                                                                                               | <input type="text"/>                                                                                                                                                                                                                                                                   | <input type="text"/> | minuti al giorno     |                      |               |                      |                      |                      |                  |

|                                                                                                                                                                                                                                                                                           |                                                                                                                         |
|-------------------------------------------------------------------------------------------------------------------------------------------------------------------------------------------------------------------------------------------------------------------------------------------|-------------------------------------------------------------------------------------------------------------------------|
| 3. Di nuovo, tenga conto solo di quelle attività che l'hanno impegnata per almeno 10 minuti ogni volta. Per quanti giorni, negli <b>ultimi 7 giorni</b> , lei ha compiuto attività fisiche <b>moderate</b> , come ad esempio trasportare dei pesi leggeri, durante <b>il suo lavoro</b> ? | <input type="text"/> giorni alla settimana<br><br><input type="checkbox"/> Nemmeno uno <b>-&gt; vada alla domanda 4</b> |
|-------------------------------------------------------------------------------------------------------------------------------------------------------------------------------------------------------------------------------------------------------------------------------------------|-------------------------------------------------------------------------------------------------------------------------|

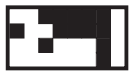

|                                                                                                                                                                                                                                         |                                                                                                                                                                                                                                                                   |                      |                      |                      |                      |                      |                      |
|-----------------------------------------------------------------------------------------------------------------------------------------------------------------------------------------------------------------------------------------|-------------------------------------------------------------------------------------------------------------------------------------------------------------------------------------------------------------------------------------------------------------------|----------------------|----------------------|----------------------|----------------------|----------------------|----------------------|
| 3.1 Quanto tempo in totale, normalmente in uno di questi giorni, lei ha trascorso compiendo attività fisiche <b>moderate</b> , durante <b>il suo lavoro</b> ?                                                                           | <table><tr><td><input type="text"/></td><td><input type="text"/></td><td><input type="text"/></td></tr></table> ore al giorno<br><table><tr><td><input type="text"/></td><td><input type="text"/></td><td><input type="text"/></td></tr></table> minuti al giorno | <input type="text"/> |
| <input type="text"/>                                                                                                                                                                                                                    | <input type="text"/>                                                                                                                                                                                                                                              | <input type="text"/> |                      |                      |                      |                      |                      |
| <input type="text"/>                                                                                                                                                                                                                    | <input type="text"/>                                                                                                                                                                                                                                              | <input type="text"/> |                      |                      |                      |                      |                      |
| 4. Negli <b>ultimi 7 giorni</b> , per quanti giorni lei ha <b>camminato</b> per almeno 10 minuti ogni volta, durante <b>il suo lavoro</b> ? La preghiamo di non considerare le camminate compiute per recarsi o per tornare dal lavoro. | <input type="text"/> giorni alla settimana<br><input type="checkbox"/> Nemmeno uno -> <b>vada alla SEZIONE 2: SPOSTAMENTI</b>                                                                                                                                     |                      |                      |                      |                      |                      |                      |
| 4.1 Per quanto tempo in totale, normalmente in uno di questi giorni, lei ha <b>camminato</b> durante il suo lavoro?                                                                                                                     | <table><tr><td><input type="text"/></td><td><input type="text"/></td><td><input type="text"/></td></tr></table> ore al giorno<br><table><tr><td><input type="text"/></td><td><input type="text"/></td><td><input type="text"/></td></tr></table> minuti al giorno | <input type="text"/> |
| <input type="text"/>                                                                                                                                                                                                                    | <input type="text"/>                                                                                                                                                                                                                                              | <input type="text"/> |                      |                      |                      |                      |                      |
| <input type="text"/>                                                                                                                                                                                                                    | <input type="text"/>                                                                                                                                                                                                                                              | <input type="text"/> |                      |                      |                      |                      |                      |

## SEZIONE 2: SPOSTAMENTI

Le seguenti domande riguardano il modo abituale in cui lei si sposta per recarsi da un posto all'altro, includendo il luogo di lavoro, i negozi, il cinema e così via.

|                                                                                                                                                                    |                                                                                                                                                                                                                                                                   |                      |                      |                      |                      |                      |                      |
|--------------------------------------------------------------------------------------------------------------------------------------------------------------------|-------------------------------------------------------------------------------------------------------------------------------------------------------------------------------------------------------------------------------------------------------------------|----------------------|----------------------|----------------------|----------------------|----------------------|----------------------|
| 5. Per quanti giorni, negli <b>ultimi 7 giorni</b> , lei si è <b>spostato con un veicolo a motore</b> , come ad esempio il treno, il bus o la macchina?            | <input type="text"/> giorni alla settimana<br><input type="checkbox"/> Nemmeno uno -> <b>vada alla domanda 6</b>                                                                                                                                                  |                      |                      |                      |                      |                      |                      |
| 5.1 Per quanto tempo in totale, normalmente in uno di questi giorni, lei si è <b>spostato</b> con il treno, il bus, la macchina od altri tipi di veicolo a motore? | <table><tr><td><input type="text"/></td><td><input type="text"/></td><td><input type="text"/></td></tr></table> ore al giorno<br><table><tr><td><input type="text"/></td><td><input type="text"/></td><td><input type="text"/></td></tr></table> minuti al giorno | <input type="text"/> |
| <input type="text"/>                                                                                                                                               | <input type="text"/>                                                                                                                                                                                                                                              | <input type="text"/> |                      |                      |                      |                      |                      |
| <input type="text"/>                                                                                                                                               | <input type="text"/>                                                                                                                                                                                                                                              | <input type="text"/> |                      |                      |                      |                      |                      |

Consideri ora solo i percorsi in **bicicletta o a piedi**, che lei potrebbe aver compiuto per recarsi e/o per tornare dal lavoro, per fare delle commissioni, o ancora per spostarsi da un posto all'altro.

|                                                                                                                                                                    |                                                                                                                                                                                                                                                                   |                      |                      |                      |                      |                      |                      |
|--------------------------------------------------------------------------------------------------------------------------------------------------------------------|-------------------------------------------------------------------------------------------------------------------------------------------------------------------------------------------------------------------------------------------------------------------|----------------------|----------------------|----------------------|----------------------|----------------------|----------------------|
| 6. Per quanti giorni, negli <b>ultimi 7 giorni</b> , lei ha usato la <b>bicicletta</b> per tratti di almeno 10 minuti per spostarsi <b>da un posto all'altro</b> ? | <input type="text"/> giorni alla settimana<br><input type="checkbox"/> Nemmeno uno -> <b>vada alla domanda 7</b>                                                                                                                                                  |                      |                      |                      |                      |                      |                      |
| 6.1 Per quanto tempo in totale, normalmente in uno di questi giorni, lei ha usato la <b>bicicletta</b> , per spostarsi da un posto all'altro?                      | <table><tr><td><input type="text"/></td><td><input type="text"/></td><td><input type="text"/></td></tr></table> ore al giorno<br><table><tr><td><input type="text"/></td><td><input type="text"/></td><td><input type="text"/></td></tr></table> minuti al giorno | <input type="text"/> |
| <input type="text"/>                                                                                                                                               | <input type="text"/>                                                                                                                                                                                                                                              | <input type="text"/> |                      |                      |                      |                      |                      |
| <input type="text"/>                                                                                                                                               | <input type="text"/>                                                                                                                                                                                                                                              | <input type="text"/> |                      |                      |                      |                      |                      |
| 7. Per quanti giorni, negli <b>ultimi 7 giorni</b> , lei ha <b>camminato</b> per tratti di almeno 10 minuti per spostarsi da un posto all'altro?                   | <input type="text"/> giorni alla settimana<br><input type="checkbox"/> Nemmeno uno-> <b>vada alla SEZIONE 3: LAVORI DOMESTICI, MANUTENZIONE DELL'ABITAZIONE, PRENDERSI CURA DEI FAMILIARI</b>                                                                     |                      |                      |                      |                      |                      |                      |

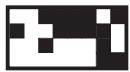

|                                                                                                                                     |                                                                                                                                                                                                                                                                                    |                      |                      |                      |               |                      |                      |                      |                  |
|-------------------------------------------------------------------------------------------------------------------------------------|------------------------------------------------------------------------------------------------------------------------------------------------------------------------------------------------------------------------------------------------------------------------------------|----------------------|----------------------|----------------------|---------------|----------------------|----------------------|----------------------|------------------|
| 7.1 Per quanto tempo in totale, normalmente in uno di questi giorni, lei ha <b>camminato</b> , per spostarsi da un posto all'altro? | <table border="1"> <tr> <td><input type="text"/></td><td><input type="text"/></td><td><input type="text"/></td> <td>ore al giorno</td> </tr> <tr> <td><input type="text"/></td><td><input type="text"/></td><td><input type="text"/></td> <td>minuti al giorno</td> </tr> </table> | <input type="text"/> | <input type="text"/> | <input type="text"/> | ore al giorno | <input type="text"/> | <input type="text"/> | <input type="text"/> | minuti al giorno |
| <input type="text"/>                                                                                                                | <input type="text"/>                                                                                                                                                                                                                                                               | <input type="text"/> | ore al giorno        |                      |               |                      |                      |                      |                  |
| <input type="text"/>                                                                                                                | <input type="text"/>                                                                                                                                                                                                                                                               | <input type="text"/> | minuti al giorno     |                      |               |                      |                      |                      |                  |

### SEZIONE 3: LAVORI DOMESTICI, MANUTENZIONE DELL'ABITAZIONE, PRENDERSI CURA DEI FAMILIARI

Questa parte riguarda alcune delle attività fisiche che lei potrebbe aver svolto negli **ultimi 7 giorni** presso la sua abitazione, come ad esempio i lavori domestici, il giardinaggio, altri lavori all'aperto, lavori di manutenzione generale, o la cura dei familiari.

|                                                                                                                                                                                                                                                                                                                                      |                                                                                                                                                                                                                                                                                    |                      |                      |                      |               |                      |                      |                      |                  |
|--------------------------------------------------------------------------------------------------------------------------------------------------------------------------------------------------------------------------------------------------------------------------------------------------------------------------------------|------------------------------------------------------------------------------------------------------------------------------------------------------------------------------------------------------------------------------------------------------------------------------------|----------------------|----------------------|----------------------|---------------|----------------------|----------------------|----------------------|------------------|
| 8. Consideri solo quelle attività che l'hanno impegnata per almeno 10 minuti ogni volta. Per quanti giorni, negli <b>ultimi 7 giorni</b> , lei ha compiuto attività fisiche <b>intense</b> , come ad esempio sollevare dei pesi, tagliare la legna, spalare la neve o scavare dei buchi, <b>nel giardino o nel cortile</b> ?         | <input type="text"/> giorni alla settimana<br><input type="checkbox"/> Nemmeno uno -> <b>vada alla domanda 9</b>                                                                                                                                                                   |                      |                      |                      |               |                      |                      |                      |                  |
| 8.1 Quanto tempo in totale, normalmente in uno di questi giorni, lei ha trascorso compiendo attività fisiche <b>intense</b> , nel giardino o nel cortile?                                                                                                                                                                            | <table border="1"> <tr> <td><input type="text"/></td><td><input type="text"/></td><td><input type="text"/></td> <td>ore al giorno</td> </tr> <tr> <td><input type="text"/></td><td><input type="text"/></td><td><input type="text"/></td> <td>minuti al giorno</td> </tr> </table> | <input type="text"/> | <input type="text"/> | <input type="text"/> | ore al giorno | <input type="text"/> | <input type="text"/> | <input type="text"/> | minuti al giorno |
| <input type="text"/>                                                                                                                                                                                                                                                                                                                 | <input type="text"/>                                                                                                                                                                                                                                                               | <input type="text"/> | ore al giorno        |                      |               |                      |                      |                      |                  |
| <input type="text"/>                                                                                                                                                                                                                                                                                                                 | <input type="text"/>                                                                                                                                                                                                                                                               | <input type="text"/> | minuti al giorno     |                      |               |                      |                      |                      |                  |
| 9. Di nuovo, consideri solo quelle attività che l'hanno impegnata per almeno 10 minuti ogni volta. Per quanti giorni, negli <b>ultimi 7 giorni</b> , lei ha compiuto attività fisiche <b>moderate</b> , come ad esempio trasportare dei pesi leggeri, lavare le finestre, scopare e rastrellare, <b>nel giardino o nel cortile</b> ? | <input type="text"/> giorni alla settimana<br><input type="checkbox"/> Nemmeno uno -> <b>vada alla domanda 10</b>                                                                                                                                                                  |                      |                      |                      |               |                      |                      |                      |                  |
| 9.1 Quanto tempo in totale, normalmente in uno di questi giorni, lei ha trascorso compiendo attività fisiche <b>moderate</b> , nel giardino o nel cortile?                                                                                                                                                                           | <table border="1"> <tr> <td><input type="text"/></td><td><input type="text"/></td><td><input type="text"/></td> <td>ore al giorno</td> </tr> <tr> <td><input type="text"/></td><td><input type="text"/></td><td><input type="text"/></td> <td>minuti al giorno</td> </tr> </table> | <input type="text"/> | <input type="text"/> | <input type="text"/> | ore al giorno | <input type="text"/> | <input type="text"/> | <input type="text"/> | minuti al giorno |
| <input type="text"/>                                                                                                                                                                                                                                                                                                                 | <input type="text"/>                                                                                                                                                                                                                                                               | <input type="text"/> | ore al giorno        |                      |               |                      |                      |                      |                  |
| <input type="text"/>                                                                                                                                                                                                                                                                                                                 | <input type="text"/>                                                                                                                                                                                                                                                               | <input type="text"/> | minuti al giorno     |                      |               |                      |                      |                      |                  |
| 10. Di nuovo, consideri solo quelle attività che l'hanno impegnata per almeno 10 minuti ogni volta. Per quanti giorni, negli <b>ultimi 7 giorni</b> , lei ha compiuto attività fisiche <b>moderate</b> , come ad esempio trasportare dei pesi leggeri, lavare le finestre, lavare il pavimento e scopare, <b>dentro casa</b> ?       | <input type="text"/> giorni alla settimana<br><input type="checkbox"/> Nemmeno uno -> <b>vada alla SEZIONE 4: ATTIVITÀ FISICA PER SVAGO, SPORT OD ESERCIZIO, DURANTE IL TEMPO LIBERO</b>                                                                                           |                      |                      |                      |               |                      |                      |                      |                  |
| 10.1 Quanto tempo in totale, normalmente in uno di questi giorni, lei ha trascorso compiendo attività fisiche <b>moderate</b> , <b>dentro casa</b> ?                                                                                                                                                                                 | <table border="1"> <tr> <td><input type="text"/></td><td><input type="text"/></td><td><input type="text"/></td> <td>ore al giorno</td> </tr> <tr> <td><input type="text"/></td><td><input type="text"/></td><td><input type="text"/></td> <td>minuti al giorno</td> </tr> </table> | <input type="text"/> | <input type="text"/> | <input type="text"/> | ore al giorno | <input type="text"/> | <input type="text"/> | <input type="text"/> | minuti al giorno |
| <input type="text"/>                                                                                                                                                                                                                                                                                                                 | <input type="text"/>                                                                                                                                                                                                                                                               | <input type="text"/> | ore al giorno        |                      |               |                      |                      |                      |                  |
| <input type="text"/>                                                                                                                                                                                                                                                                                                                 | <input type="text"/>                                                                                                                                                                                                                                                               | <input type="text"/> | minuti al giorno     |                      |               |                      |                      |                      |                  |

### SEZIONE 4: ATTIVITÀ FISICA PER SVAGO, SPORT OD ESERCIZIO, DURANTE IL TEMPO LIBERO

Questa parte riguarda tutte le attività fisiche che lei ha compiuto negli **ultimi 7 giorni** esclusivamente per svago, sport od esercizio durante il tempo libero. La preghiamo di non includere nessuna attività che dovesse aver già preso in considerazione per rispondere alle domande precedenti.

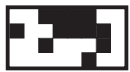

|                                                                                                                                                                                                                                                                                                                                                        |                                                                                                                                                                        |
|--------------------------------------------------------------------------------------------------------------------------------------------------------------------------------------------------------------------------------------------------------------------------------------------------------------------------------------------------------|------------------------------------------------------------------------------------------------------------------------------------------------------------------------|
| <p>11. Escludendo le camminate già prese in considerazione precedentemente, per quanti giorni, negli <b>ultimi 7 giorni</b>, lei ha <b>camminato</b> per almeno 10 minuti ogni volta, durante il <b>suo tempo libero</b>?</p>                                                                                                                          | <p><input type="text"/> giorni alla settimana</p> <p><input type="checkbox"/> Nemmeno uno -&gt; <b>vada alla domanda 12</b></p>                                        |
| <p>11.1 Per quanto tempo in totale, normalmente in uno di questi giorni, lei ha <b>camminato</b> durante il suo tempo libero?</p>                                                                                                                                                                                                                      | <p><input type="text"/><input type="text"/><input type="text"/> ore al giorno</p> <p><input type="text"/><input type="text"/><input type="text"/> minuti al giorno</p> |
| <p>12. Consideri solo quelle attività che l'hanno impegnata per almeno 10 minuti ogni volta. Per quanti giorni, negli <b>ultimi 7 giorni</b>, lei ha compiuto attività fisiche <b>intense</b>, come ad esempio ginnastica aerobica, corsa a piedi, ciclismo a velocità sostenuta o nuoto a velocità sostenuta, durante il <b>suo tempo libero</b>?</p> | <p><input type="text"/> giorni alla settimana</p> <p><input type="checkbox"/> Nemmeno uno -&gt; <b>vada alla domanda 13</b></p>                                        |
| <p>12.1 Quanto tempo in totale, normalmente in uno di questi giorni, lei ha trascorso compiendo attività fisiche <b>intense</b>, durante il suo tempo libero?</p>                                                                                                                                                                                      | <p><input type="text"/><input type="text"/><input type="text"/> ore al giorno</p> <p><input type="text"/><input type="text"/><input type="text"/> minuti al giorno</p> |
| <p>13. Di nuovo, consideri solo quelle attività che l'hanno impegnata per almeno 10 minuti ogni volta. Per quanti giorni, negli <b>ultimi 7 giorni</b>, lei ha compiuto attività fisiche <b>moderate</b>, come ad esempio ciclismo ad andatura moderata, nuoto ad andatura moderata, tennis in doppio, durante il <b>suo tempo libero</b>?</p>         | <p><input type="text"/> giorni alla settimana</p> <p><input type="checkbox"/> Nemmeno uno --&gt; <b>vada alla SEZIONE 5: TEMPO TRASCORSO STANDO SEDUTI</b></p>         |
| <p>13.1 Quanto tempo in totale, normalmente in uno di questi giorni, lei ha trascorso compiendo attività fisiche <b>moderate</b>, durante il suo tempo libero?</p>                                                                                                                                                                                     | <p><input type="text"/><input type="text"/><input type="text"/> ore al giorno</p> <p><input type="text"/><input type="text"/><input type="text"/> minuti al giorno</p> |

### SEZIONE 5: TEMPO TRASCORSO STANDO SEDUTI

Le ultime domande riguardano il tempo che lei ha trascorso ogni giorno stando seduto. Mentre era al lavoro, a casa, mentre frequentava un corso di formazione e durante il tempo libero. È compreso il tempo trascorso seduto ad una scrivania, mentre stava visitando degli amici, quando ha letto qualcosa, o si è seduto o disteso per guardare la televisione. Non consideri nessun intervallo di tempo nel quale è rimasto seduto a bordo di un veicolo a motore, che abbia già conteggiato precedentemente.

|                                                                                                                                                        |                                                                                                                                                                        |
|--------------------------------------------------------------------------------------------------------------------------------------------------------|------------------------------------------------------------------------------------------------------------------------------------------------------------------------|
| <p>14. Negli <b>ultimi 7 giorni</b>, quanto tempo in totale lei ha trascorso rimanendo <b>seduto</b>, durante un <b>giorno lavorativo</b>?</p>         | <p><input type="text"/><input type="text"/><input type="text"/> ore al giorno</p> <p><input type="text"/><input type="text"/><input type="text"/> minuti al giorno</p> |
| <p>15. Negli <b>ultimi 7 giorni</b>, quanto tempo in totale lei ha trascorso rimanendo <b>seduto</b>, durante un <b>giorno del fine settimana</b>?</p> | <p><input type="text"/><input type="text"/><input type="text"/> ore al giorno</p> <p><input type="text"/><input type="text"/><input type="text"/> minuti al giorno</p> |
