# Supplementary material for: Validation of the long international physical activity questionnaire: Influence of age and language region
Source: PubMed Central journal article supplement — Prev Med Rep. 2016 Mar 9;3:250–6. doi: 10.1016/j.pmedr.2016.03.003 (PMC4929234; doi:10.1016/j.pmedr.2016.03.003), 2016-03-09
Supplement: mmc5.pdf [file mmc5.pdf]

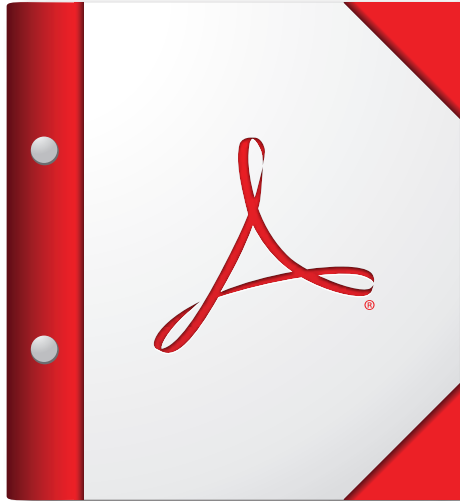

**For the best experience, open this PDF portfolio in  
Acrobat 9 or Adobe Reader 9, or later.**

[Get Adobe Reader Now!](#)
