# Supplementary figures and images for: Validation of the long international physical activity questionnaire: Influence of age and language region
Source: PubMed Central journal article supplement — Prev Med Rep. 2016 Mar 9;3:250–6. doi: 10.1016/j.pmedr.2016.03.003 (PMC4929234; doi:10.1016/j.pmedr.2016.03.003), 2016-03-09

Supplementary Material Figure 1.  
Total PA (mvpa, min/week) by region

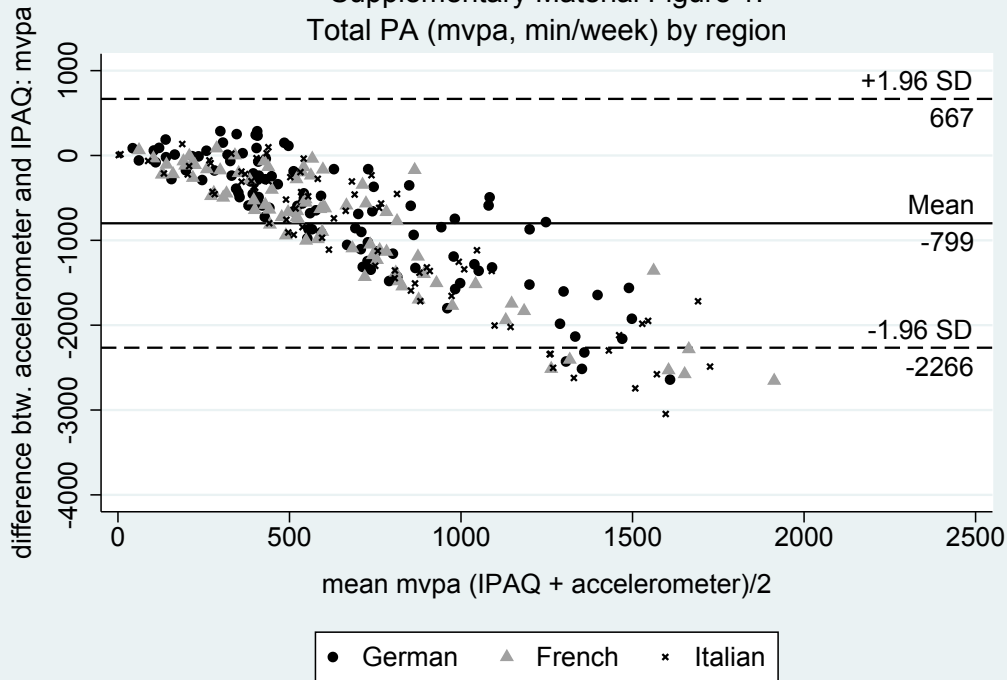

Supplement: mmc4.pdf [file mmc4.pdf]
